# Supplementary material
Source: PubMed Central journal article supplement (PMC5040501)
Supplement: NIHMS68448-supplement-Description_of_Raw_data.pdf [file NIHMS68448-supplement-Description_of_Raw_data.pdf]

## Description of Raw data

### ADAPTATION TO NUMBER OPERATES ON PERCEIVED RATHER THAN PHYSICAL NUMEROSITY

Fornaciai, Cicchini, Burr

All the raw data files are included. We have lumped all data from all the conditions in a single excel file.

Each Excel sheet contains data for a single subject. Each subject is identified via two letters.

Within each sheet each row corresponds to an experimental trial. The first column is stimulus numerosity, the second column contains the subject's response (i.e. 'bigger or smaller'). The third column codes for Adaptation condition (1 is Adaptation, 0 is Baseline). The fourth column is Condition (1 is Unconnected, 2 is Connected, 3 is Matched).

Stimulus intensity (i.e. numerosity) is coded in logarithmic units (base 10) respect to the reference numerosity. In most conditions the reference is 20, hence for instance a value of  $-0.1505$  Log-units corresponds to a probe stimulus with numerosity  $20 * 10^{(-0.1505)}$  which is 14. Please mind that in the "matched" condition the baseline was not 20 and had been established via the Connected-Baseline experiment (typically between 14 and 16).

Kind Regards,

Michele Fornaciai ([fornaciai@hotmail.it](mailto:fornaciai@hotmail.it))

Guido Marco Cicchini ([cicchini@in.cnr.it](mailto:cicchini@in.cnr.it))

David Burr ([dave@in.cnr.it](mailto:dave@in.cnr.it))
